# Supplementary material for: Control and stability of self-assembled monolayers under biosensing conditions
Source: Royal Society of Chemistry journal article supplement (doi:10.1039/c1jm10132c), 2011-01-01
Supplement: c1jm10132c.pdf [file c1jm10132c.pdf]

*Supplementary information for*

## **Control and stability of self assembled monolayers under biosensing conditions**

Oliver Seitz<sup>1</sup>, Poornika G. Fernandes<sup>1</sup>, Ruhai Tian<sup>1</sup>, Nikhil Karnik<sup>1</sup>, Huang-Chun Wen<sup>2</sup>, Harvey Stiegler<sup>1</sup>, Richard A. Chapman<sup>1</sup>, Eric M. Vogel<sup>1</sup>, Yves J. Chabal<sup>1#</sup>

<sup>1</sup> University of Texas at Dallas, Richardson, TX, USA

<sup>2</sup> Texas Instrument Inc., Dallas, TX, USA

**Effect of Plasma treatment on the SiO<sub>2</sub> layer investigated by IR spectroscopy.**

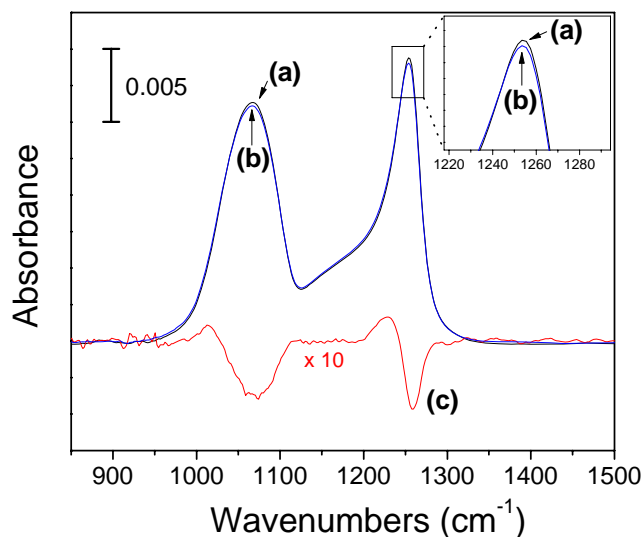

Figure S1: Absorption spectra of freshly cleaned SiO<sub>2</sub>/Si substrate before (a) and after (b) O<sub>2</sub> plasma treatment. Spectrum (c) is the difference absorption emphasizing the changes due to the plasma treatment. A removal/disturbance of the SiO<sub>2</sub> absorption bands occurs during the treatment.

### **Estimation of the SiO<sub>2</sub> damages due to the O<sub>2</sub> plasma treatment**

Previous infrared spectroscopy investigations in our laboratory on silicon samples (Fz, double sides polished) have shown that for samples with 10 Å silicon oxide (on each side) gives an integrated area of 0.33 cm<sup>-1</sup>. The measurement is performed in transmission (~70° incidence) and the thickness is measured by ellipsometry. The integrated area is measured between 900 cm<sup>-1</sup> and 1300 cm<sup>-1</sup>, which covers the LO and TO modes of the SiO<sub>2</sub> present.

According to the SiO<sub>2</sub> absorption spectra shown in Fig. S1, recorded before and after O<sub>2</sub> plasma treatment, an integrated area of 2.86 cm<sup>-1</sup> and 2.84 cm<sup>-1</sup> is estimated, respectively. These areas correspond to thicknesses before and after treatment of 8.6 nm and 8.1 nm, respectively. Note that these thicknesses are in good agreement with the 6.7 nm SiO<sub>2</sub> thickness (ellipsometry thickness) of our starting wafers. We can then conclude that the O<sub>2</sub> plasma treatment leads to SiO<sub>2</sub> removal/damage in the top 5 Å of the SiO<sub>2</sub> layer. Considering the large range of thickness found in the literature corresponding to a 1 monolayer of SiO<sub>2</sub> (from 0.2 to 0.47nm), the damages are confined in the two first monolayers.
